during the summer before starting their final year, such as our Summer Vacation Studentships, which are grants to fund laboratory-based placements. More information on internships and placements can be found on our website at [www.biochemistry.org/Internshipsandplacements](http://www.biochemistry.org/Internshipsandplacements).

More information about the Biochemical Society Summer Vacation Studentship scheme can be found at [www.biochemistry.org/summervacationstudentships](http://www.biochemistry.org/summervacationstudentships).

## Postgraduate study

As a bioscience graduate, you may want to choose to continue studying rather than seek employment. Postgraduate qualifications often allow you to apply for more specialized jobs that aren't available to the majority of graduates, and allow you to concentrate on a particular subject that interests you most.

There are a variety of different postgraduate courses available, such as PhDs which are research-based and allow you to develop your scientific knowledge. Or others such as a PGCE teaching qualification or a Masters course in business or journalism, for example, which allow you to gain a new skill set while still building on your scientific knowledge.

## Useful links

**[www.prospects.ac.uk](http://www.prospects.ac.uk)**: the UK's official graduate careers website, it contains CV and interview advice and job listings ordered by job sector

**[www.careerpath.com](http://www.careerpath.com)**: a website which has several online career tests, as well as CV builders, resources and links to career-oriented sites

**[www.gradjobs.co.uk](http://www.gradjobs.co.uk)**: an online magazine with information on where to look for a job, how to spice up your CV, interview techniques and more

**<http://targetjobs.co.uk/career-sectors/science-and-research>**: information on the skills that science employers look for, as well as FAQs and interviews with employed science graduates

**[www.jobsinscience.com](http://www.jobsinscience.com)**: a recruitment site that also contains CV and interview guides

**[www.biosciencecareers.org](http://www.biosciencecareers.org)**: a useful blog to keep you up to date with news, events, tips and tools, career paths, and other useful information ■

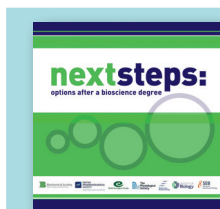

Check out our careers guide for bioscience graduates, produced in collaboration with numerous other bioscience learned societies, *Next Steps: Options After a Bioscience Degree*. This is available online at [www.societyofbiology/nextsteps](http://www.societyofbiology/nextsteps) and a hard copy is sent to all undergraduate members when joining the Biochemical Society.

# Recognizing rising stars in biochemistry

**Alexa Hime**

(Acting Head of Education)

The Society exists to promote excellence in research and education in the field of molecular bioscience. As part of this, we sought to recognize excellence at an undergraduate level, which led to the creation of our Undergraduate Recognition Awards. These Awards are offered for institutions to award, at their discretion, an outstanding undergraduate from a molecular bioscience or related course, from any year of study.

The awards not only recognize the rising stars of tomorrow, but also provide the students with something to distinguish themselves from their peers, and demonstrate commitment to science and their career. For the student, the Society provides one year's free membership as continued support.

Anna Kam, the prize winner from the University of Edinburgh, said, "I feel so privileged to have received this Biochemical Society Award. It really is an extremely encouraging and rewarding way to finish university life. I'd like to thank all the people who helped me achieve it, particularly all my professors and supervisors who were so patient and supportive, and my peers who I know all worked just as hard and would have equally undoubtedly deserved the award too. Finally, thank you to the Biochemical Society for granting this prize; adding extra motivation for all students to aim high and showing that hard work pays off."

If you are interested in finding out more about the prizes, please contact your Local Ambassador ([www.biochemistry.org/LocalAmbassadors](http://www.biochemistry.org/LocalAmbassadors)), see our webpages ([www.biochemistry.org/UndergraduateAwards](http://www.biochemistry.org/UndergraduateAwards)), or contact [membership@biochemistry.org](mailto:membership@biochemistry.org). ■

**Please note: only one prize will be awarded per institution per year.**

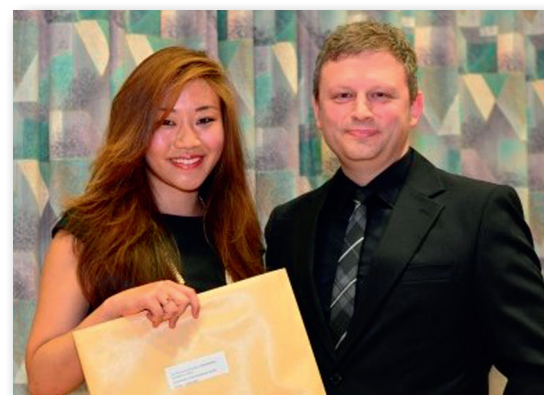

Anna Kam with Matt Brook (Local Ambassador for University of Edinburgh)
